# Supplementary material for: Establishment of an in vitro thrombogenicity test system with cyclic olefin copolymer substrate for endothelial layer formation
Source: PubMed Central journal article supplement (PMC8422954; doi:10.1557/s43579-021-00072-6), 2021-09-07
Supplement: 43579_2021_72_MOESM1_ESM.pdf [file 43579_2021_72_MOESM1_ESM.pdf]

Supporting Information for

## In Vitro Thrombogenicity Test System with Cyclic Olefin Copolymer Substrate for Endothelial Layer Formation

Skadi Lau<sup>1</sup>, Yue Liu<sup>1</sup>, Anna Maier<sup>1</sup>, Steffen Braune<sup>1</sup>, Manfred Gossen<sup>1</sup>, Axel T. Neffe<sup>1</sup>, Andreas Lendlein<sup>1,2,\*</sup>

1: Institute of Active Polymers and Berlin-Brandenburg Center for Regenerative Therapies, Helmholtz-Zentrum Hereon, Teltow, Germany

2: Institute of Chemistry, University of Potsdam, Potsdam, Germany

\*Corresponding author: andreas.lendlein@hereon.de

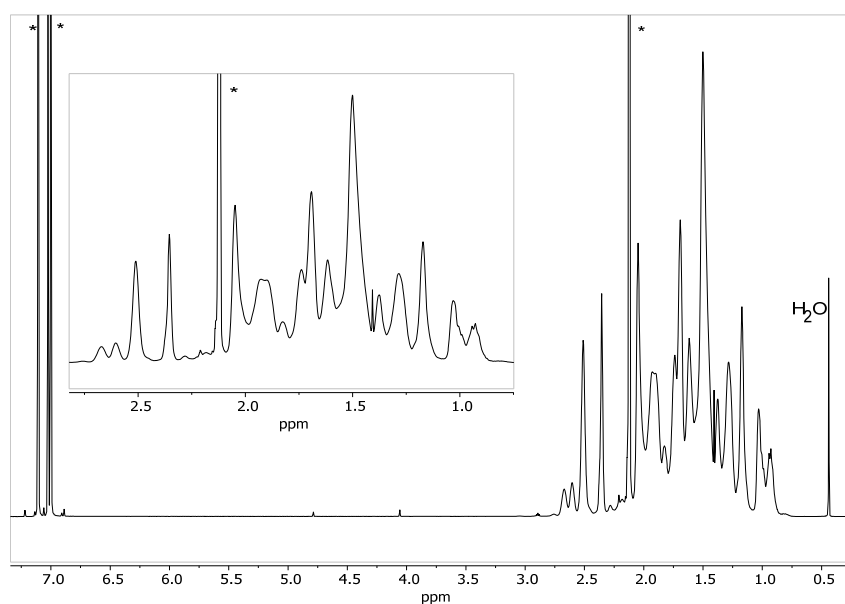

**Figure S1:** 700 MHz <sup>1</sup>H NMR spectrum of the COC-based substrate in toluene-d<sub>8</sub> at 68 °C. \* indicates solvent peaks.

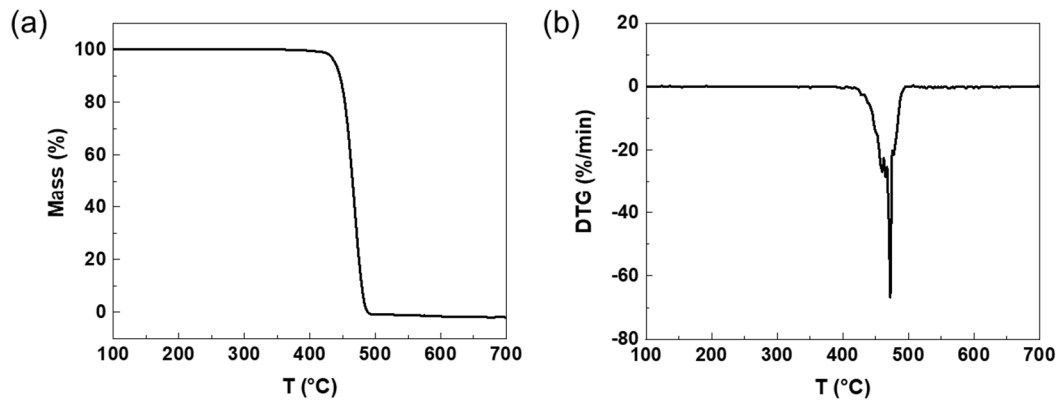

**Figure S2:** (a) TGA and (b) DTG curve of the COC-based substrate.

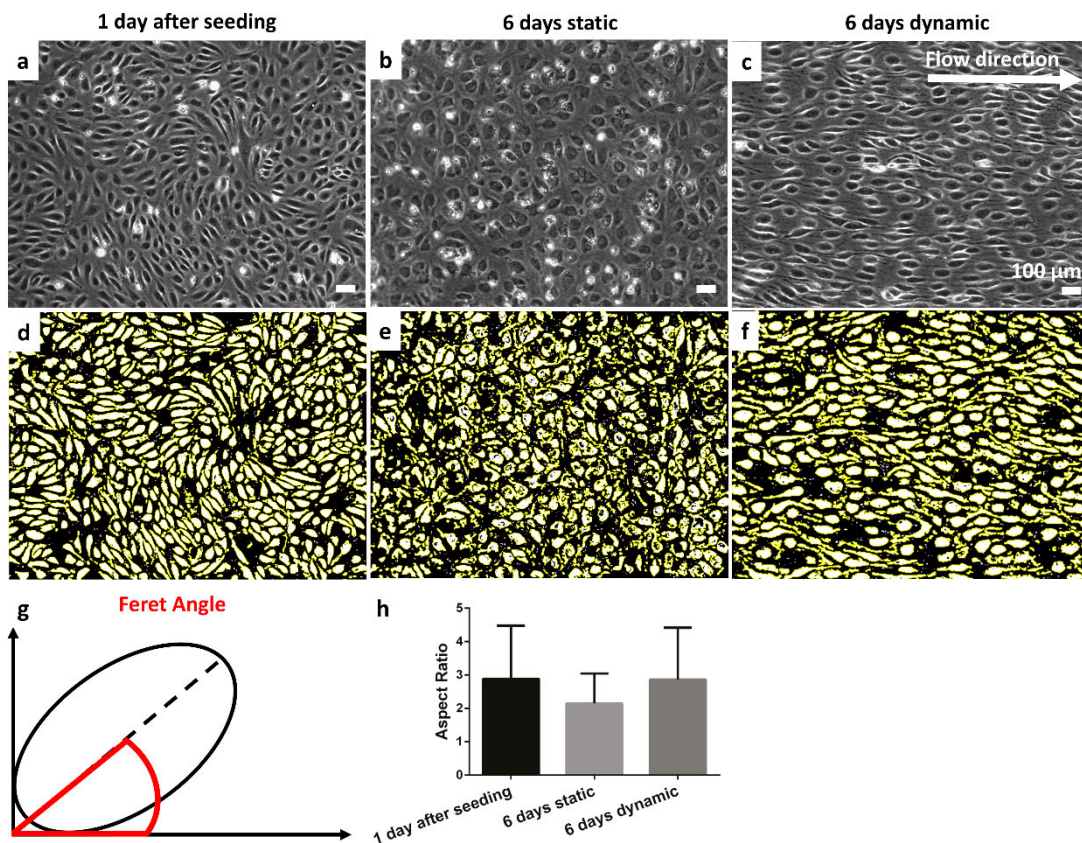

**Figure S3:** Quantification of endothelial cell (EC) alignment under static and dynamic culture conditions. EC were cultured for 1 day under static conditions (a) prior to the cultivation under quasi-static conditions ( $0.01 \text{ dyn} \cdot \text{cm}^{-2}$ , b) or laminar flow for six days ( $10 \text{ dyn} \cdot \text{cm}^{-2}$ , c). EC alignment was measured by the ImageJ software (d-f) and subsequent quantification of the Feret Angle (g). Feret Angle of statically cultured EC was greater than of EC cultivated under flow (h).
